# Supplementary material for: Lifestyle Patterns Begin in Early Childhood, Persist and Are Socioeconomically Patterned, Confirming the Importance of Early Life Interventions
Source: PubMed Central journal article supplement (PMC7146362; doi:10.3390/nu12030724), 2020-03-09
Supplement: nutrients-12-00724-s001.pdf [file nutrients-12-00724-s001.pdf]

**Table S1** PCA loadings for the multi-time-point lifestyle patterns (LP) in InFANT from 1.5 y to 5 y and in InFANT Extend from 1.5 y to 3.5 y.

| Study<br><i>n</i>          | InFANT<br>247                                          |             |             |                                                     |             |             | InFANT Extend<br>210                                |             |                                                  |             |
|----------------------------|--------------------------------------------------------|-------------|-------------|-----------------------------------------------------|-------------|-------------|-----------------------------------------------------|-------------|--------------------------------------------------|-------------|
|                            | LP1                                                    |             |             | LP2                                                 |             |             | LP1                                                 |             | LP2                                              |             |
| Lifestyle pattern          | 1.5 y                                                  | 3.5 y       | 5 y         | 1.5 y                                               | 3.5 y       | 5 y         | 1.5 y                                               | 3.5 y       | 1.5 y                                            | 3.5 y       |
| Age                        |                                                        |             |             |                                                     |             |             |                                                     |             |                                                  |             |
| Behavioural variables      |                                                        |             |             |                                                     |             |             |                                                     |             |                                                  |             |
| Fruit <sup>a</sup>         | 0.03                                                   | 0.03        | 0.04        | <b>0.29</b>                                         | <b>0.35</b> | <b>0.30</b> | 0.03                                                | 0.02        | <b>0.45</b>                                      | <b>0.44</b> |
| Vegetables                 | 0.01                                                   | -0.03       | 0.01        | <b>0.34</b>                                         | <b>0.41</b> | <b>0.35</b> | -0.01                                               | -0.02       | <b>0.41</b>                                      | <b>0.45</b> |
| Water                      | -0.02                                                  | -0.10       | -0.10       | 0.22                                                | 0.19        | 0.20        | -0.16                                               | -0.10       | 0.00                                             | -0.04       |
| Sweet drinks               | <b>0.25</b>                                            | <b>0.29</b> | <b>0.29</b> | -0.02                                               | -0.03       | -0.03       | <b>0.35</b>                                         | <b>0.39</b> | 0.05                                             | 0.15        |
| Discretionary sweet foods  | <b>0.29</b>                                            | <b>0.33</b> | <b>0.32</b> | 0.02                                                | 0.05        | 0.05        | <b>0.36</b>                                         | <b>0.33</b> | -0.07                                            | -0.03       |
| Discretionary savory foods | <b>0.28</b>                                            | <b>0.34</b> | <b>0.31</b> | -0.01                                               | 0.02        | -0.07       | <b>0.35</b>                                         | <b>0.39</b> | 0.02                                             | 0.05        |
| TV                         | <b>0.26</b>                                            | 0.23        | 0.16        | -0.01                                               | 0.05        | -0.04       | 0.24                                                | <b>0.34</b> | -0.22                                            | -0.17       |
| Outdoor                    | 0.08                                                   | 0.05        | -0.04       | 0.15                                                | <b>0.26</b> | <b>0.26</b> | 0.09                                                | 0.05        | 0.22                                             | <b>0.28</b> |
| % variance explained       | 15.0                                                   |             |             | 13.2                                                |             |             | 16.4                                                |             | 14.8                                             |             |
| Label                      | “Discretionary consumption and TV at 1.5, 3.5 and 5 y” |             |             | “Fruit, vegetables and outdoor at 1.5, 3.5 and 5 y” |             |             | “Discretionary consumption and TV at 1.5 and 3.5 y” |             | “Fruit, vegetables and outdoor at 1.5 and 3.5 y” |             |

<sup>a</sup>Fruit was summed consumption of 10 fruits; at 1.5 y in the InFANT sample banana was not reported so fruit was summed consumption of 9 fruits. In bold: Factor loadings <-0.25 or >0.25.
